# Supplementary material for: Understanding the Origins of Bacterial Resistance to Aminoglycosides through Molecular Dynamics Mutational Study of the Ribosomal A-Site
Source: PLOS journal article supplement (doi:10.1371/journal.pcbi.1002099), 2011-07-21
Supplement: S3 (10.1371/journal.pcbi.1002099.s003) [file journal.pcbi.1002099.s003]

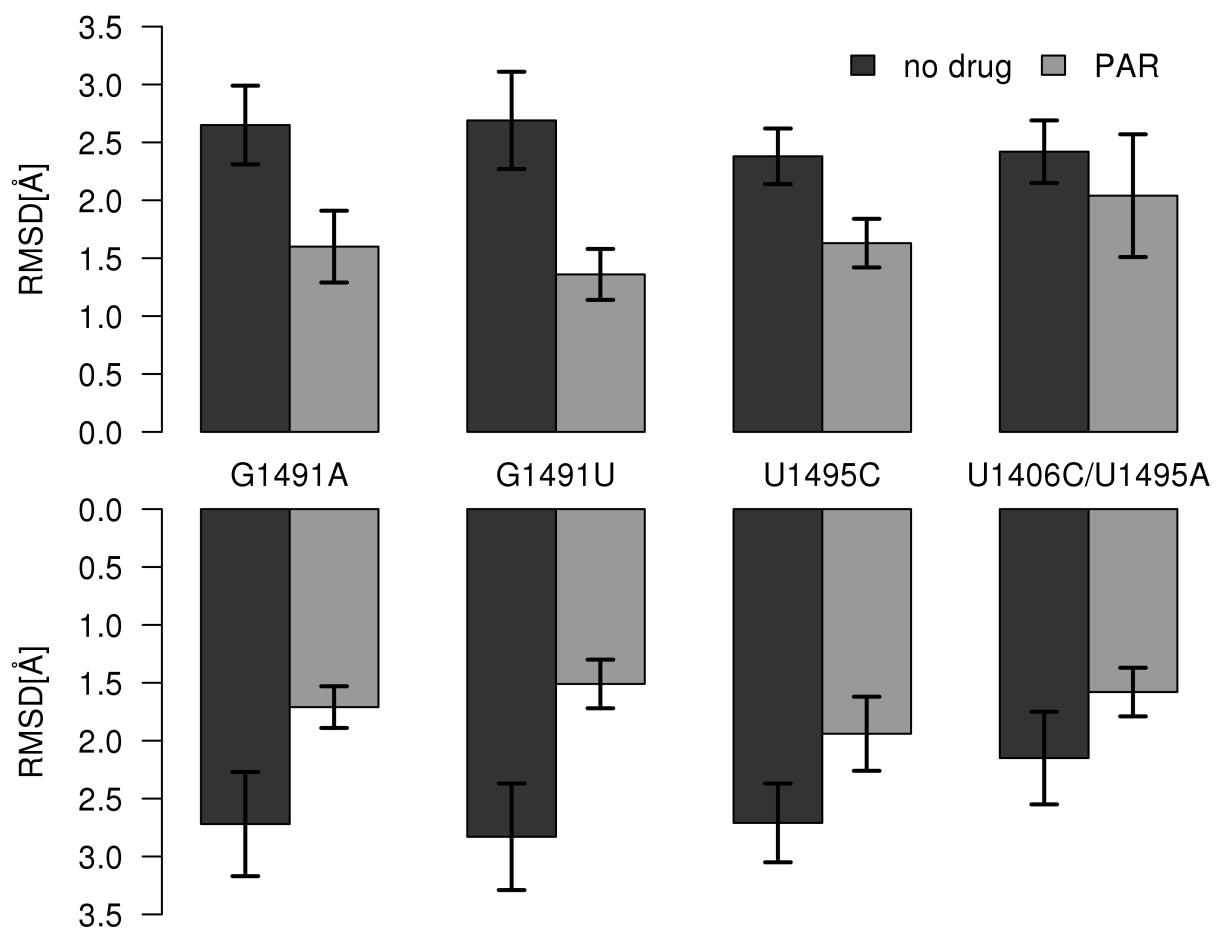

Figure S2: Average RMSD [Ångstrom] with their standard deviations; two graphs depict RMSD for two A-sites.
