# Supplementary material for: Understanding the Origins of Bacterial Resistance to Aminoglycosides through Molecular Dynamics Mutational Study of the Ribosomal A-Site
Source: PLOS journal article supplement (doi:10.1371/journal.pcbi.1002099), 2011-07-21
Supplement: S6 (10.1371/journal.pcbi.1002099.s006) [file journal.pcbi.1002099.s006]

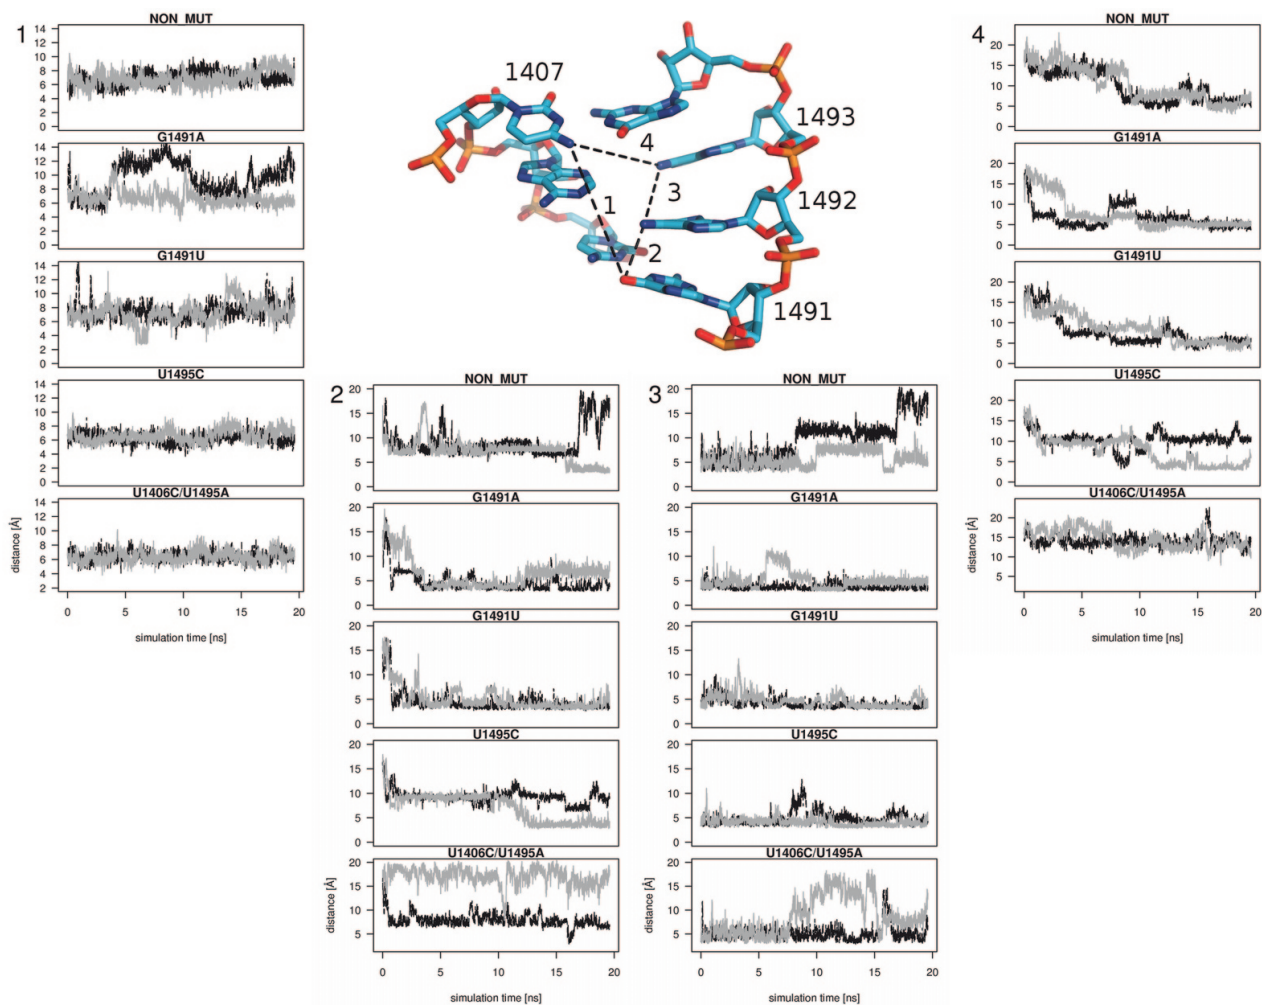

Figure S5: Distances between chosen atoms inside the A-site as a function of the simulation time. Four sets of graphs correspond to four distances (1, 2, 3, 4) depicted as black dotted lines on a stick model of the A-site fragment; for base numbering see Figure 1a. Grey and black lines are for two simulated A-sites.
