# Supplementary material for: Understanding the Origins of Bacterial Resistance to Aminoglycosides through Molecular Dynamics Mutational Study of the Ribosomal A-Site
Source: PLOS journal article supplement (doi:10.1371/journal.pcbi.1002099), 2011-07-21
Supplement: S8 (10.1371/journal.pcbi.1002099.s008) [file journal.pcbi.1002099.s008]

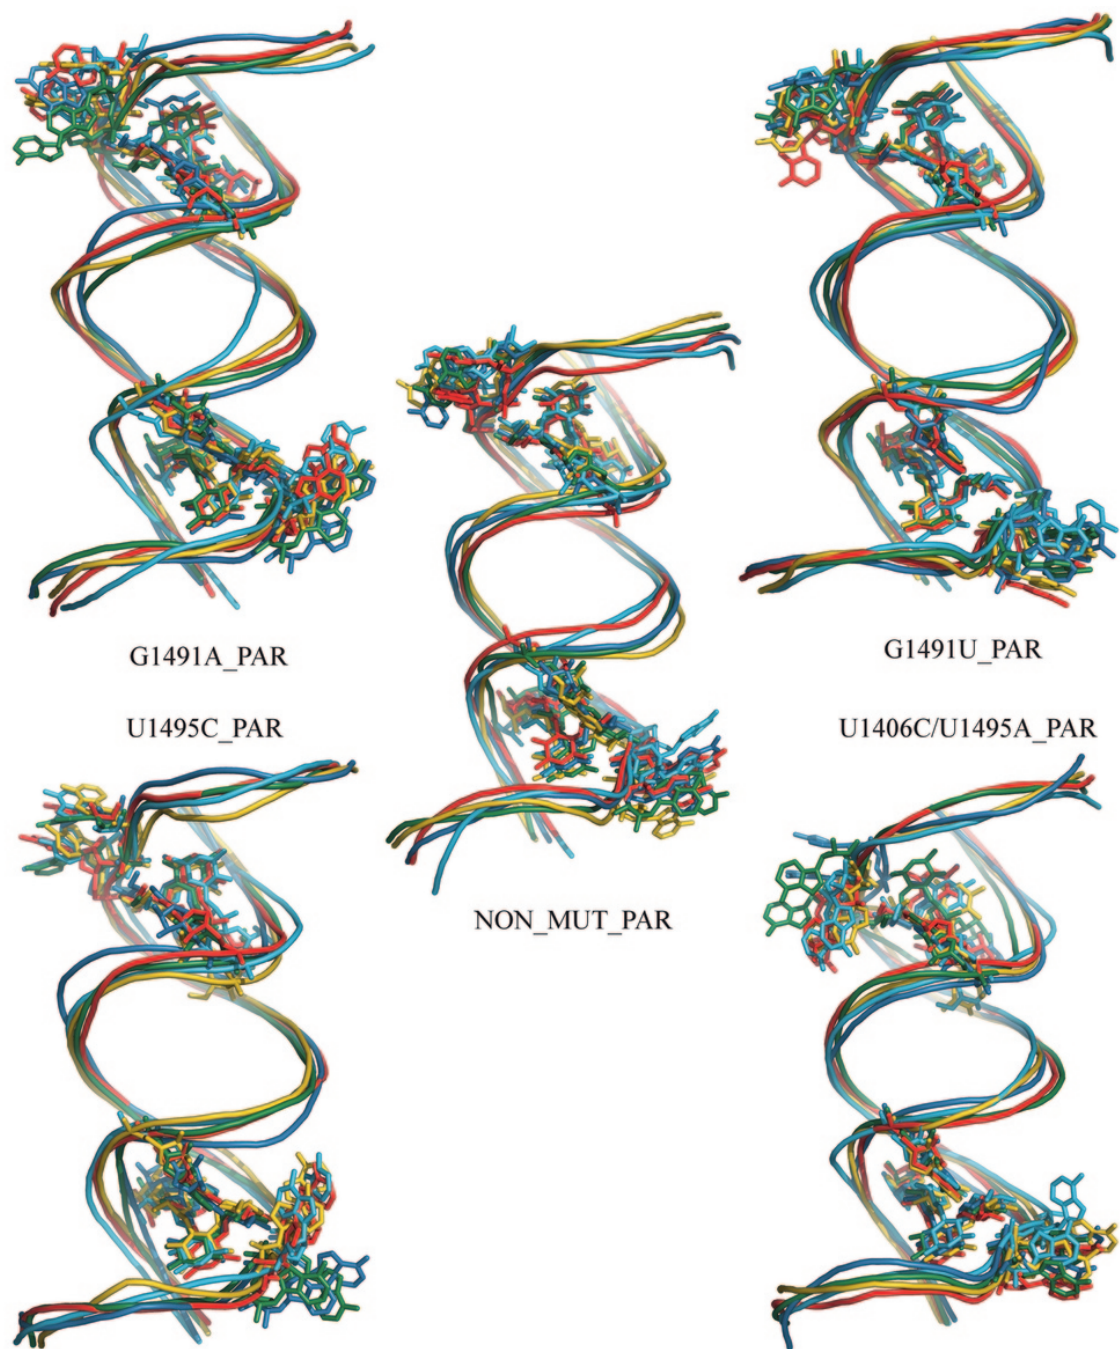

Figure S7: **Representative structures of the clusters for different MD simulations of the A-site in the complex with paromomycin**, superposed with regard to phosphorous atoms. Structures from each cluster are colored differently: 1 — green, 2 — blue, 3 — red, 4 — yellow, 5 — cyan (see Table S1 for the cluster sizes). Paromomycin and A1492, A1493 and A1408 are shown in atomic detail.
