# Supplementary material for: Understanding the Origins of Bacterial Resistance to Aminoglycosides through Molecular Dynamics Mutational Study of the Ribosomal A-Site
Source: PLOS journal article supplement (doi:10.1371/journal.pcbi.1002099), 2011-07-21
Supplement: S14 (10.1371/journal.pcbi.1002099.s014) [file journal.pcbi.1002099.s014]

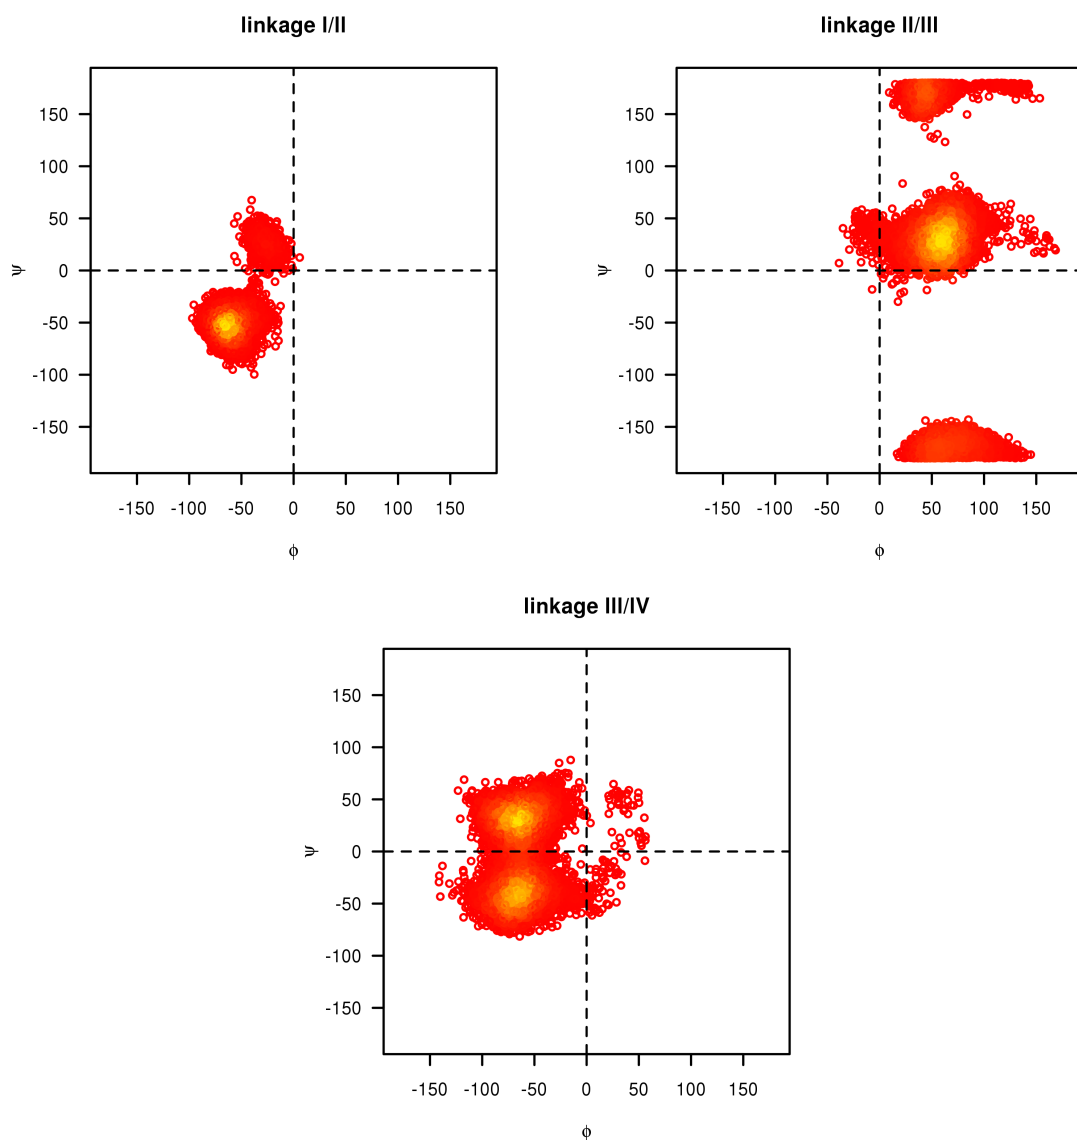

Figure S13: **Dihedral angles of linkages between the rings of paromomycin.** The angles  $\phi$  and  $\psi$  are defined as in [Asensio, J. L. *et al.*, Chemistry. **2002**, 8, 5228-40], an NMR study of neomycin, which differs from paromomycin only with one chemical group, having OH instead of  $\text{NH}_3^+$ . The values were collected during two independent 10-ns production phases of MD of paromomycin in water (the two runs started from the same minimized structure but with different initial velocities).
