# Supplementary material for: Understanding the Origins of Bacterial Resistance to Aminoglycosides through Molecular Dynamics Mutational Study of the Ribosomal A-Site
Source: PLOS journal article supplement (doi:10.1371/journal.pcbi.1002099), 2011-07-21
Supplement: S15 (10.1371/journal.pcbi.1002099.s015) [file journal.pcbi.1002099.s015]

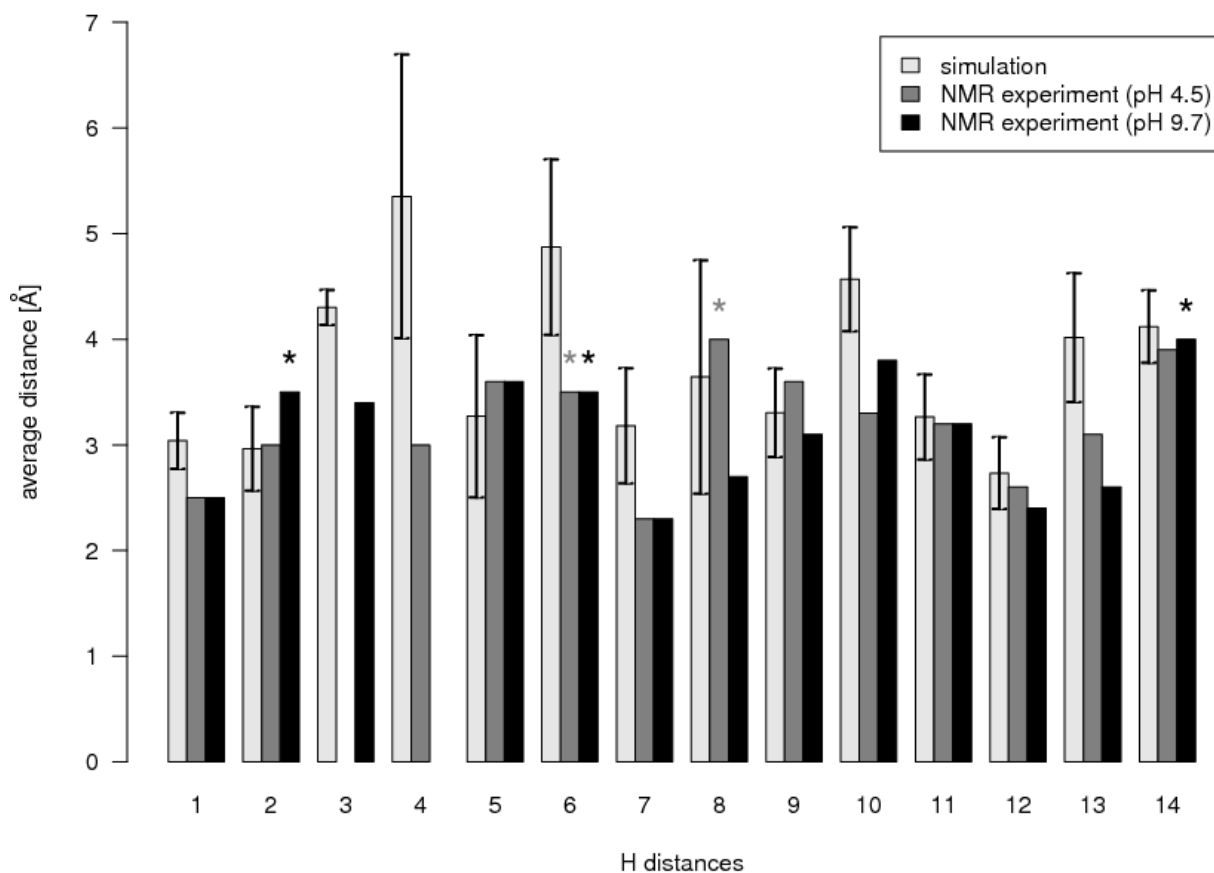

Figure S14: **Distances between chosen hydrogen atoms of paromomycin**, compared with values from an NMR study of neomycin, which differs from paromomycin only with one chemical group, having OH instead of  $\text{NH}_3^+$ . The experimental values are taken from Table 1 in [Asensio, J. L. *et al.*, Chemistry. **2002**, 8, 5228-40] and are as follows: 1 —  $\text{H1}_{\text{Glc}}-\text{H4}_{\text{Strp}}$ , 2 —  $\text{H1}_{\text{Glc}}-\text{H5}_{\text{Strp}}$ , 3 —  $\text{H1}_{\text{Glc}}-\text{H3}_{\text{Strp}}$ , 4 —  $\text{H1}_{\text{Glc}}-\text{H5}_{\text{Rib}}$ , 5 —  $\text{H1}_{\text{Glc}}-\text{H2}_{\text{Rib}}$ , 6 —  $\text{H1}_{\text{Glc}}-\text{H3}_{\text{Rib}}$ , 7 —  $\text{H1}_{\text{Rib}}-\text{H5}_{\text{Strp}}$ , 8 —  $\text{H1}_{\text{Rib}}-\text{H4}_{\text{Strp}}$ , 9 —  $\text{H1}_{\text{Rib}}-\text{H6}_{\text{Strp}}$ , 10 —  $\text{H2}_{\text{Rib}}-\text{H6}_{\text{Strp}}$ , 11 —  $\text{H1}_{\text{Rib}}-\text{H4}_{\text{Rib}}$ , 12 —  $\text{H1}_{\text{Ido}}-\text{H3}_{\text{Rib}}$ , 13 —  $\text{H1}_{\text{Ido}}-\text{H2}_{\text{Rib}}$ , 14 —  $\text{H1}_{\text{Ido}}-\text{H4}_{\text{Rib}}$ . The asterisks (\*) mark the distances that were described as “larger than” in the experimental work.
